# Supplementary material for: Mortality and years of life lost of colorectal cancer in China, 2005–2020: findings from the national mortality surveillance system
Source: PubMed Central journal article supplement — Chin Med J (Engl). 2021 Jul 14;134(16):1933–40. doi: 10.1097/CM9.0000000000001625 (PMC8382386; doi:10.1097/cm9.0000000000001625), 2021-07-14
Supplement: cm9-134-1933-s001.pdf [file cm9-134-1933-s001.pdf]

**Supplementary Table 1: Theoretical minimum risk reference life table.**

| <b>Age (years)</b> | <b>Life expectancy (years)</b> |
|--------------------|--------------------------------|
| 0                  | 87.885872                      |
| 1                  | 87.007248                      |
| 5                  | 83.035378                      |
| 10                 | 78.050774                      |
| 15                 | 73.069237                      |
| 20                 | 68.110138                      |
| 25                 | 63.157372                      |
| 30                 | 58.207291                      |
| 35                 | 53.27124                       |
| 40                 | 48.368408                      |
| 45                 | 43.49641                       |
| 50                 | 38.703121                      |
| 55                 | 33.98209                       |
| 60                 | 29.31563                       |
| 65                 | 24.73456                       |
| 70                 | 20.32095                       |
| 75                 | 16.09445                       |
| 80                 | 12.18093                       |
| 85                 | 8.7796783                      |
| 90                 | 6.0613198                      |
| 95                 | 3.8977709                      |
| 100                | 2.2286451                      |
| 105                | 1.6117361                      |
| 110                | 1.363304                       |
